# Supplementary material
Source: MDPI journal article supplement (https://www.mdpi.com/2072-4292/15/18/4472)
Supplement: s1 [file s1]

# Supplementary Material

## 1. Figure

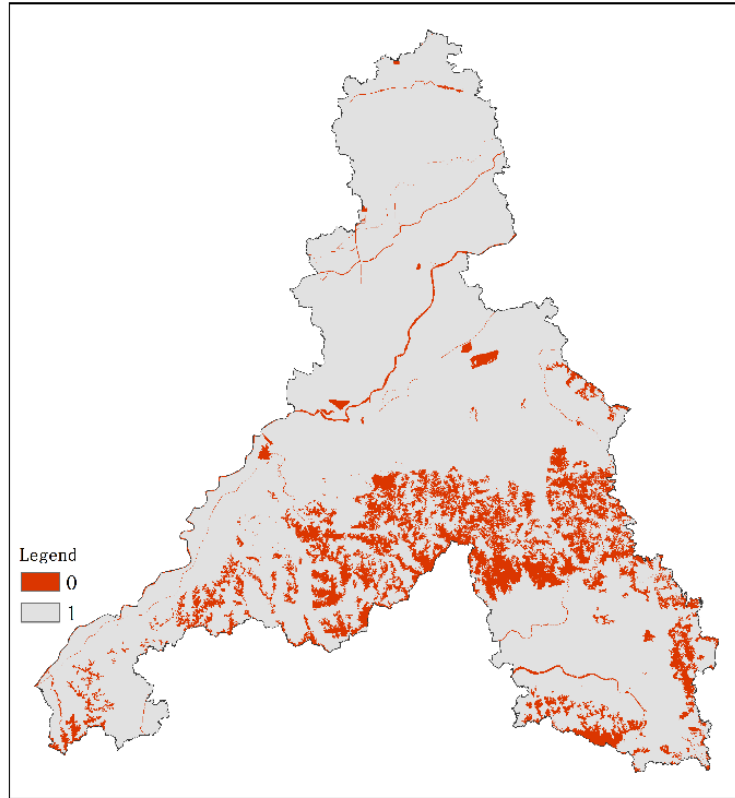

**Figure S1.** The restrictive factors for ecological conservation scenario (S2).

## 2. Tables

**Table S1.** Data sources for this study and optimal parameters for the OPGD model.

| Data Type                  | Driving Factor                                    | Optimum classification           |                           |
|----------------------------|---------------------------------------------------|----------------------------------|---------------------------|
|                            |                                                   | method and classification number | Factor Description/source |
| Physical Geography Factors | A1: Elevation                                     | Quantile/8                       | http://www.gscloud.cn     |
|                            | A2: Slope                                         | Geometric/8                      |                           |
|                            | A3: Aspect                                        | Standard Deviation /6            |                           |
|                            | A4: Annual average precipitation                  | Standard Deviation/6             | http://www.geodata.cn     |
|                            | A5: Annual average temperature                    | Quantile/8                       |                           |
|                            | A6: Normalized difference vegetation index (NDVI) | Geometric/8                      | http://www.resdc.cn       |
| Socio-economic factors     | B1: Gross domestic product (GDP)                  | Quantile/6                       | https://hub.worldpop.org  |
|                            | B2: Density of population                         | Geometric/7                      |                           |
|                            | B3: Density of commercial services                | Natural Breakpoint/8             |                           |
|                            | B4: Density of cultural facility services         | Standard Deviation /3            | http://www.rivermap.cn    |
|                            | B5: Density of other public services              | Quantile/8                       |                           |
|                            | B6: Nighttime light index                         | Discrete Variable                |                           |
| Accessibility factors      | C1: Distance from main roads                      | Quantile/5                       | http://www.rivermap.cn    |
|                            | C2: Distance from national roads                  | Quantile/8                       |                           |
|                            | C3: Distance from provincial roads                | Natural Breakpoint/8             |                           |
|                            | C4: Distance from the highway                     | Equal/6                          |                           |
|                            | C5: Distance from railroad                        | Quantile/7                       |                           |
|                            | C6: Distance from the river                       | Quantile/8                       |                           |

**Table S2** Land-use conversion cost matrix under the three scenarios.

|    | Scenario 1 |    |    |    |    |    | Scenario 2 |    |    |    |    |    | Scenario 3 |    |    |    |    |    |
|----|------------|----|----|----|----|----|------------|----|----|----|----|----|------------|----|----|----|----|----|
|    | FL         | FR | GL | WT | BL | UL | FL         | FR | GL | WT | BL | UL | FL         | FR | GL | WT | BL | UL |
| FL | 1          | 1  | 1  | 1  | 1  | 0  | 1          | 1  | 1  | 1  | 1  | 0  | 1          | 1  | 1  | 1  | 1  | 1  |
| FR | 1          | 1  | 1  | 1  | 1  | 1  | 1          | 1  | 1  | 1  | 1  | 1  | 1          | 1  | 1  | 1  | 1  | 1  |
| GL | 1          | 1  | 1  | 1  | 1  | 1  | 1          | 1  | 1  | 1  | 1  | 1  | 1          | 1  | 1  | 1  | 1  | 1  |
| WT | 1          | 1  | 1  | 1  | 1  | 0  | 0          | 0  | 0  | 0  | 0  | 0  | 1          | 0  | 1  | 1  | 1  | 1  |
| BL | 1          | 1  | 1  | 1  | 1  | 0  | 0          | 0  | 0  | 0  | 1  | 0  | 0          | 0  | 0  | 0  | 1  | 0  |
| UL | 1          | 1  | 1  | 1  | 1  | 1  | 1          | 1  | 1  | 1  | 1  | 1  | 1          | 1  | 1  | 1  | 1  | 1  |

(Note: FL: Farmland; FR: Forest; GL: Grassland; WT: Water; BL: Built land; Unused land: UL.)

**Table S3.** Results of detecting the driving factors for the spatial differentiation of carbon storage in the JNC from 2010 to 2018.

| Driving Factors | 2010               |                | 2015               |                | 2018               |                |
|-----------------|--------------------|----------------|--------------------|----------------|--------------------|----------------|
|                 | <i>q</i> statistic | <i>p</i> value | <i>q</i> statistic | <i>p</i> value | <i>q</i> statistic | <i>p-value</i> |
| A1              | 0.191              | 0.000          | 0.193              | 0.000          | 0.206              | 0.000          |
| A2              | 0.175              | 0.000          | 0.173              | 0.000          | 0.180              | 0.000          |
| A3              | 0.006              | 0.474          | 0.003              | 0.232          | 0.003              | 0.365          |
| A4              | 0.024              | 0.000          | 0.027              | 0.000          | 0.025              | 0.000          |
| A5              | 0.141              | 0.000          | 0.161              | 0.000          | 0.177              | 0.000          |
| A6              | 0.167              | 0.000          | 0.183              | 0.000          | 0.210              | 0.000          |
| B1              | 0.071              | 0.000          | 0.064              | 0.000          | 0.134              | 0.000          |
| B2              | 0.131              | 0.000          | 0.171              | 0.000          | 0.167              | 0.000          |
| B3              | 0.121              | 0.000          | 0.133              | 0.000          | 0.127              | 0.000          |
| B4              | 0.043              | 0.000          | 0.044              | 0.000          | 0.040              | 0.000          |
| B5              | 0.079              | 0.000          | 0.077              | 0.000          | 0.074              | 0.000          |
| B6              | 0.222              | 0.000          | 0.221              | 0.000          | 0.231              | 0.000          |
| C1              | 0.077              | 0.000          | 0.083              | 0.000          | 0.086              | 0.000          |
| C2              | 0.044              | 0.000          | 0.047              | 0.000          | 0.052              | 0.000          |
| C3              | 0.003              | 0.999          | 0.026              | 0.000          | 0.025              | 0.000          |
| C4              | 0.016              | 0.000          | 0.015              | 0.000          | 0.014              | 0.000          |
| C5              | 0.063              | 0.000          | 0.067              | 0.000          | 0.067              | 0.000          |
| C6              | 0.062              | 0.000          | 0.063              | 0.000          | 0.069              | 0.000          |
